# Supplementary material for: Subfunctionalization of D27 Isomerase Genes in Saffron
Source: MDPI journal article supplement (doi:10.3390/ijms231810543), 2022-09-11
Supplement: s1 [file s1]

Supplemental Figures and Tables

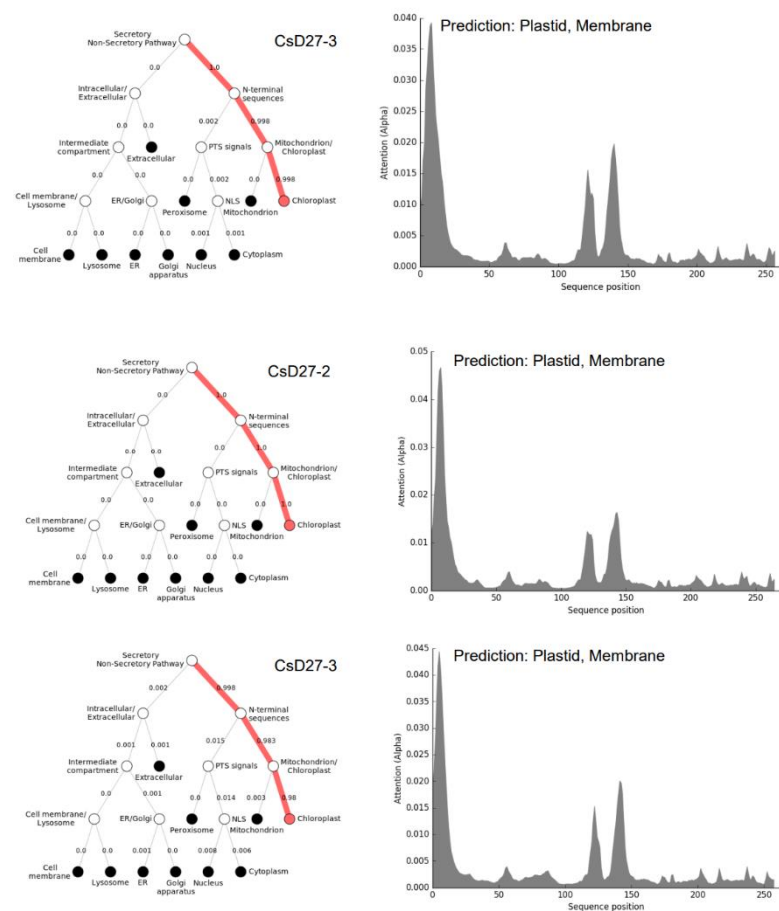

**Supplemental Figure S1.** Prediction of subcellular location of CsD27 proteins, by using: <https://services.healthtech.dtu.dk/service.php?DeepLoc-1>.

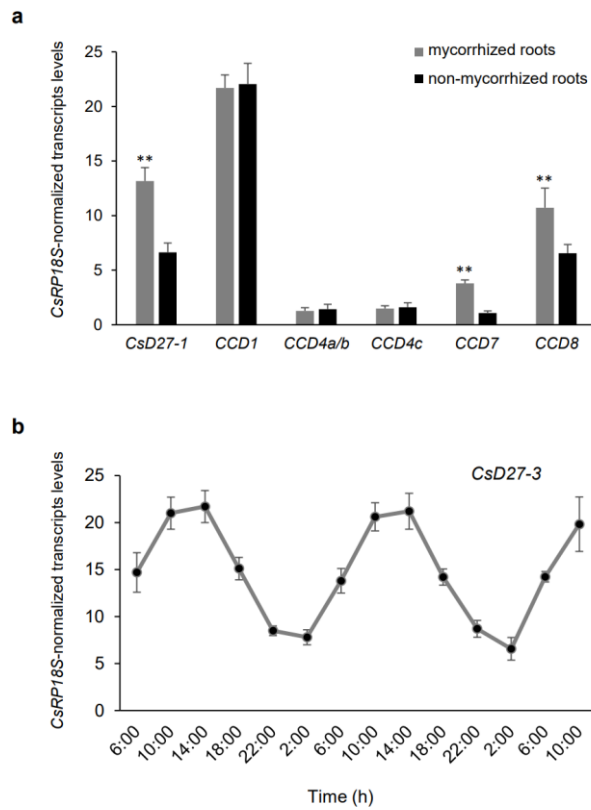

**Supplemental Figure S2.** Characterization of expression of *CsD27-1* and *CsD27-3* in root and leaf tissue, respectively. **(a)** Expression levels of *CsD27-1* and other *CCD* genes, previously characterized in saffron, both in mycorrhized and non-mycorrhized roots. Statistical analysis was performed using. Asterisks indicate statistical significance (\*\* =  $p < 0.01$  according a pairwise t-test).  $n = 3$  independent biological replicate experiments. Error bars represent SD. **(b)** Expression levels of *CsD27-3* in leaves collected at different time points. Data were presented as means  $\pm$  SD of three biological replicates.

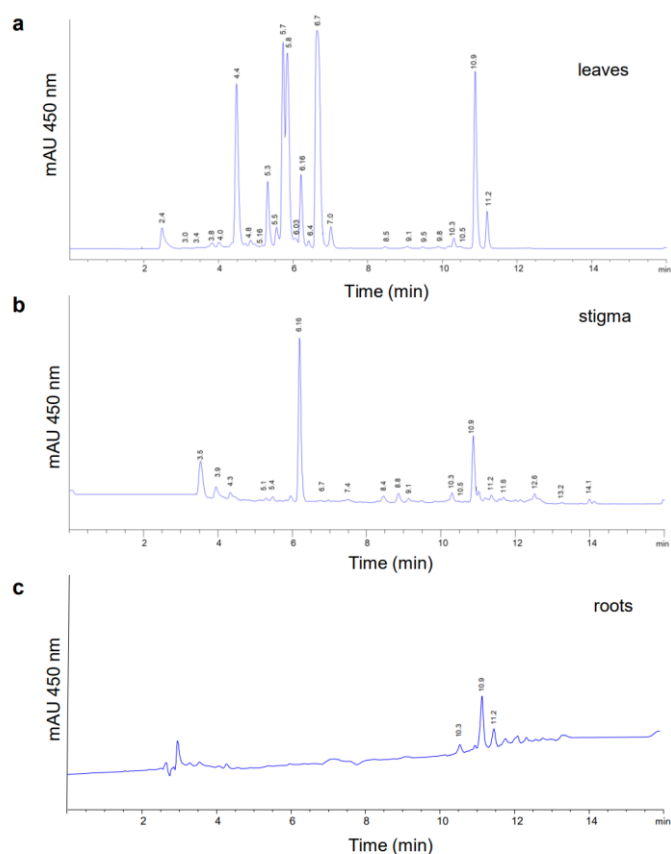

**Supplemental Figure S3.** Representative chromatograms at 450 nm for carotenoid analyses in saffron tissues. **(a)** Representative chromatogram of green leaves. **(b)** Representative chromatogram of red stigmas. **(c)** Representative chromatogram of roots. Numbers correspondence is present in Supplemental Table 2.

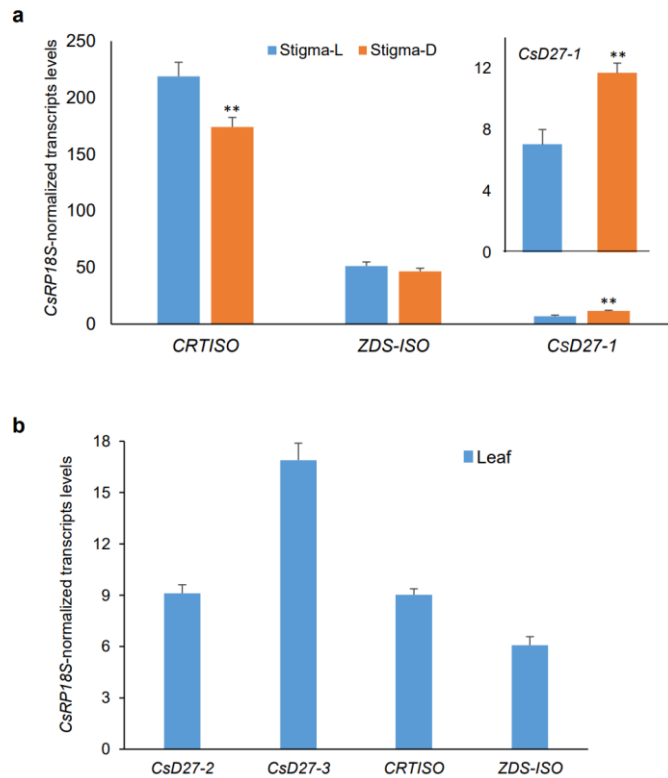

**Supplemental Figure S4.** Transcript levels of carotenoid isomerase genes in stigma (at dark (D) and light (L) conditions) (**a**) and leaf tissue (**b**), as determined by qRT-PCR. Statistical analysis was performed Using. Asterisks indicate statistical significance (\*\* =  $p < 0.01$  according a pairwise t-test).  $N = 3$  independent biological replicate experiments. Error bars represent SD.

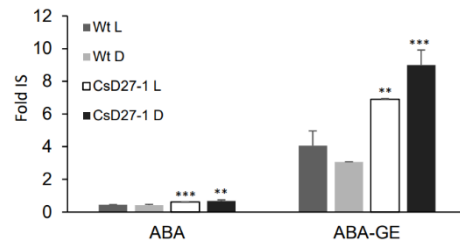

**Supplemental Figure S5.** levels of ABA and ABA glucosyl ester (ABA-GE) in *N. benthamiana* leaves agroinfiltrated with 35S::CsD27-1 or 35S:: $\emptyset$  in both dark (D) and under standard light conditions (L). Statistical analysis was performed using Asterisks indicate differences from wild type (\*\* =  $p < 0.01$ , \*\*\* =  $p < 0.005$  (t-test)). N=3 independent biological replicate experiments. Error bars represent SD.

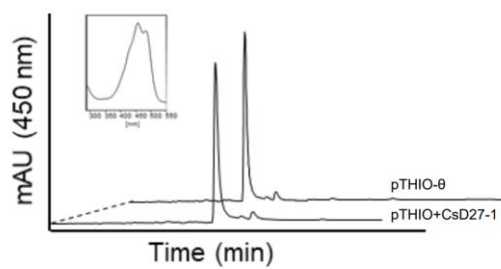

**Supplemental Figure S6.** HPLC analysis of CsD27-1 activity on *E. coli* cells producing zeaxanthin. No isomerase on zeaxanthin activity was found in cells expressing pThio+CsD27-1.

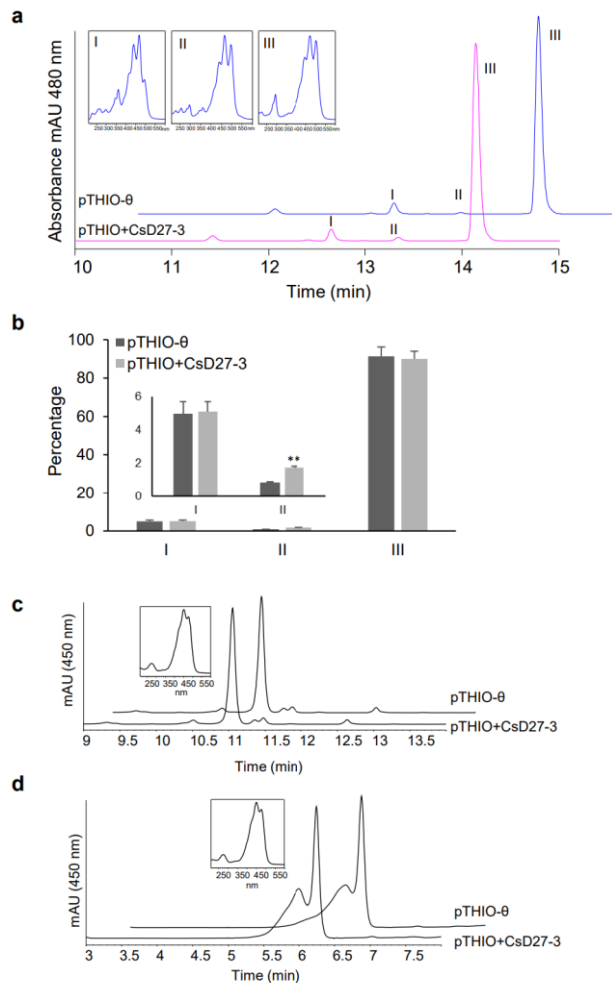

**Supplemental Figure S7.** HPLC analysis of *in vivo* CsD27-3 activity under dark conditions, and carotenoids accumulating *E. coli* cells transformed with pThio +CsD27-3 and the corresponding empty plasmid (pThio-θ). **(a)** CsD27-3 enzyme effects on all-trans-lycopene (III) and two different isomers: 15-cis-lycopene (I) 13-cis-lycopene (II). **(b)** Percentage of only one cis isomer (II) was significantly increased in the presence of CsD27-3 enzyme. A designation of \*\* =  $p < 0.01$  (t-test),  $n = 3$  independent biological replicate experiments. Error bars represent SD. **(c)** No isomerase activity on  $\beta$ -carotene was found in cells expressing pThio+CsD27-3. **(d)** No isomerase activity on zeaxanthin was found in cells expressing pThio+CsD27-3.



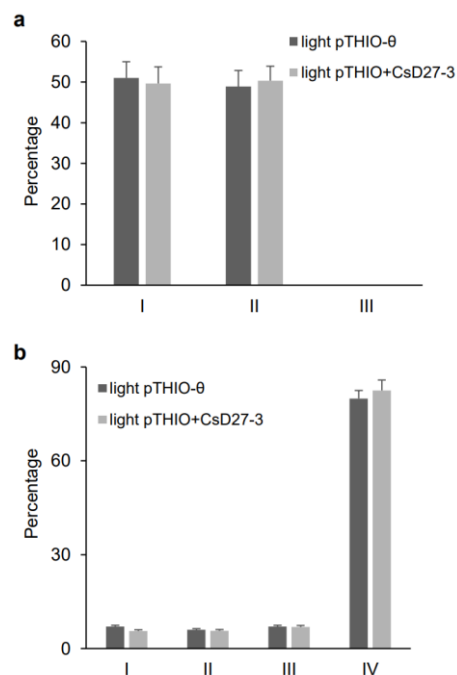

**Supplemental Figure S8.** Analysis of *in vivo* CsD27-3 activity under light conditions. Percentage of  $\zeta$ -carotene and neurosporene accumulating *E. coli* cells transformed with pThio+CsD27-3 and the corresponding empty plasmid (pThio- $\theta$ ). **(a)** CsD27-3 enzyme effects on 9-*cis*- $\zeta$ -carotene (III); 9,15,9'-tri-*cis*- $\zeta$ -carotene (I) and 9,9'-di-*cis*- $\zeta$ -carotene (II). **(b)** CsD27-3 enzyme effects on neurosporene. N = 3 independent biological replicate experiments. Error bars represent SD. Non-significant differences were found ( $P < 0.05$ )(t-test).

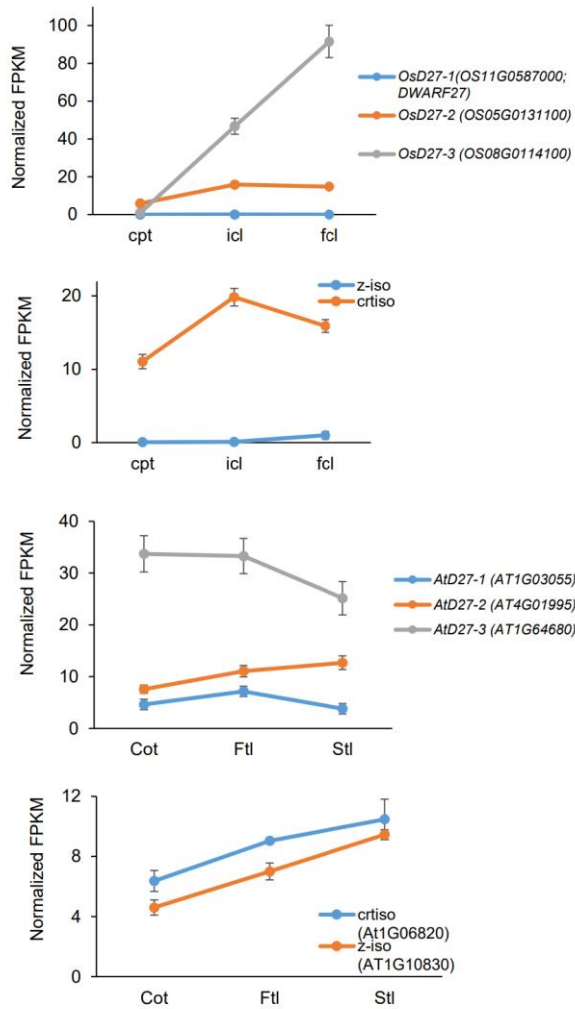

**Supplemental Figure S9.** RNA-seq-based gene expression values (FPKM) of *D27* and *D27-like* genes in rice and Arabidopsis. Data was presented as the means  $\pm$  SD of three biological replicates. Coleoptile (cpt) before the incomplete leaf (icl) appeared in rice and cotyledon (cot) before the first true leaf (ftl) appeared in Arabidopsis as stage 1 (S1), (icl) before the first complete leaf (fcl) appeared in rice and ftl before the second true leaf (stl) appeared in Arabidopsis as stage 2, fcl in rice and stl in Arabidopsis appeared fully as stage 3. Data obtained from Shi et al., (2020).

SolyC09g065750.2 (CsD27-1 homolog)

Experiment: D006: Transcriptome analysis of various tissues in wild species *S. pimpinellifolium*, LA1589

| ID    | genotype | sample                                  | normalized expression (RPKM) |
|-------|----------|-----------------------------------------|------------------------------|
| S0608 | LA1589   | anthesis flowers (0DPA)                 | 0.12                         |
| S0609 | LA1589   | 10 days post anthesis fruit (10 DPA1)   | 0.08                         |
| S0610 | LA1589   | 10 days post anthesis fruit 2 (10 DPA2) | 0.08                         |
| S0611 | LA1589   | 20 days post anthesis fruit (20DPA)     | 0.04                         |
| S0612 | LA1589   | ripening fruit (33DPA)                  | 0                            |
| S0613 | LA1589   | cotyledons (COTYL)                      | 0.71                         |
| S0614 | LA1589   | hypocotyl (HYPO)                        | 1.11                         |
| S0615 | LA1589   | vegetative meristems (MERI)             | 0.05                         |
| S0616 | LA1589   | mature leaves (ML)                      | 0.14                         |
| S0617 | LA1589   | whole root (ROOT)                       | 12.69                        |
| S0618 | LA1589   | young flower buds (YFB)                 | 0                            |
| S0619 | LA1589   | young leaves (YL)                       | 0                            |

SolyC08g008630.2 (CsD27-2 homolog)

Experiment: D006: Transcriptome analysis of various tissues in wild species *S. pimpinellifolium*, LA1589

| ID    | genotype | sample                                  | normalized expression (RPKM) |
|-------|----------|-----------------------------------------|------------------------------|
| S0608 | LA1589   | anthesis flowers (0DPA)                 | 78.73                        |
| S0609 | LA1589   | 10 days post anthesis fruit (10 DPA1)   | 31.12                        |
| S0610 | LA1589   | 10 days post anthesis fruit 2 (10 DPA2) | 26.24                        |
| S0611 | LA1589   | 20 days post anthesis fruit (20DPA)     | 14.48                        |
| S0612 | LA1589   | ripening fruit (33DPA)                  | 4.97                         |
| S0613 | LA1589   | cotyledons (COTYL)                      | 85.1                         |
| S0614 | LA1589   | hypocotyl (HYPO)                        | 35.37                        |
| S0615 | LA1589   | vegetative meristems (MERI)             | 23.88                        |
| S0616 | LA1589   | mature leaves (ML)                      | 147.25                       |
| S0617 | LA1589   | whole root (ROOT)                       | 1.43                         |
| S0618 | LA1589   | young flower buds (YFB)                 | 23.35                        |
| S0619 | LA1589   | young leaves (YL)                       | 25.2                         |

SolyC06g084610.2 (CsD27-3 homolog)

Experiment: D006: Transcriptome analysis of various tissues in wild species *S. pimpinellifolium*, LA1589

| ID    | genotype | sample                                  | normalized expression (RPKM) |
|-------|----------|-----------------------------------------|------------------------------|
| S0608 | LA1589   | anthesis flowers (0DPA)                 | 11.13                        |
| S0609 | LA1589   | 10 days post anthesis fruit (10 DPA1)   | 8.41                         |
| S0610 | LA1589   | 10 days post anthesis fruit 2 (10 DPA2) | 6.37                         |
| S0611 | LA1589   | 20 days post anthesis fruit (20DPA)     | 7.09                         |
| S0612 | LA1589   | ripening fruit (33DPA)                  | 3.32                         |
| S0613 | LA1589   | cotyledons (COTYL)                      | 32.43                        |
| S0614 | LA1589   | hypocotyl (HYPO)                        | 21.01                        |
| S0615 | LA1589   | vegetative meristems (MERI)             | 50.13                        |
| S0616 | LA1589   | mature leaves (ML)                      | 39.21                        |
| S0617 | LA1589   | whole root (ROOT)                       | 7.89                         |
| S0618 | LA1589   | young flower buds (YFB)                 | 56.93                        |
| S0619 | LA1589   | young leaves (YL)                       | 53.49                        |

**Supplemental Figure S10.** Normalized expression data of *D27* and *D27-like* genes from tomato in different tissues. Red frames indicate the higher expression values among the tissues tested.

**Supplemental Table S1.** Oligonucleotide sequences used for cloning, expression analyses and functional characterization.

|                     | Forward 5'-3'                                | Reverse 5'-3'                                |
|---------------------|----------------------------------------------|----------------------------------------------|
| Cs-D27-1-cloning    | ACCTTTATGGAATCCAGTCTTCT                      | TGCTGCTTCTAGTTTGAAGTGA                       |
| Cs-D27-2-cloning    | AGTTATCCTCATGGAAGCGGCTCT                     | TGTTACACCTTTGGACACTGAG                       |
| Cs-D27-3-cloning    | ATGGAGCTTTTACCAATGCCCA                       | CTATACATCTATAATCTCTCTCTG                     |
| Cs-D27-1-expression | GCACCAATTGTGTTGGTCTG                         | CGTCTTCAGGTTTCAGGTGGT                        |
| Cs-D27-2-expression | AAGTTCCGGGTACTCTGCTC                         | GCTTCCTCAGTCTCCGAGTT                         |
| Cs-D27-3-expression | ATGGAGCTTTTACCAATGCCCA                       | CAACACATCCGCTGTTCTCCA                        |
| Cs-D27-1-pTHIO      | cgcccttggcgaattcATGACGGAGTACAA<br>TGATAACTG  | taccctcgaggaattcCTAGTTTGAAGTGGAG<br>CAAT     |
| Cs-D27-2-pTHIO      | cgcccttggcgaattcATGAATCACTATAG<br>AAAAATTG   | taccctcgaggaattcTTACACCTTTGGACACT<br>GAG     |
| Cs-D27-3-pTHIO      | cgcccttggcgaattcATGTCACCTCCATA<br>CCAAGTTTCG | taccctcgaggaattcCTATACATCTATAATCT<br>CTCTCTG |
| CsCRTISO            | GGAGGAGGAATTTCGACGCTA                        | TGACCAACTGCTTCCAATGC                         |
| CsZETA-ISO          | AAGTCTCCGAGATGTAGGCG                         | AGGTGGAGGGGTAAAGAAGC                         |

**Supplemental Table S2.** Chromatographic and spectroscopic characteristics of the carotenoids isolated from stigma, leaves and root tissues.

| Retention time | $\lambda_{\text{max}}$       | compound                     | tissue  |
|----------------|------------------------------|------------------------------|---------|
| 2.4            | (320), 433 ,458              | unidentified                 | L       |
| 2.9            | 430, 454                     | trans-crocetin               | S       |
| 3.05           | 375, 397, 420                | unidentified                 | L       |
| 3.5            | 400sh, 424, 450              | unidentified                 | S       |
| 3.4            | 418, 440, 467                | trans-neoxanthin             | L       |
| 3.8            | (315,330) 406, 430, 456      | di-Z-violaxanthin            | L       |
| 3.9            | 434, 458                     | unidentified                 | S       |
| 4.0            | 416, 440, 470                | trans-violaxanthin           | L       |
| 4.3            | 442, 467                     | unidentified                 | S       |
| 4.4            | (328), 414, 438, 466         | cis-9-violaxanthin           | L       |
| 4.8            | 400, 422, 448                | luteoxanthin isomer          | L       |
| 5.1            | 430                          | unidentified                 | S       |
| 5.16           | (350), 420sh, 440, 468       | 13-Z-lutein                  | L       |
| 5.3            | 420, 444, 472                | Lutein isomer                | L       |
| 5.4            | 458                          | unidentified                 | S       |
| 5.5            | (331), 418sh, 438, 466       | 13'-Z-lutein                 | L       |
| 5.7            | Chlorophyll b                |                              | L       |
| 5.8            | 422, 446, 472                | all-E-lutein                 | L       |
| 5.9            | (328), 421, 444, 468 cis     | 13-Z-zeaxanthin              | L       |
| 6.03           | chlorophyll                  |                              | L       |
| 6.16           | 450, 476                     | all-E-zeaxanthin             | L, S    |
| 6.7            | Chlorophyll a                |                              | L       |
| 6.73           | 394, 416, 445                | luteoxanthin                 | S       |
| 7.0            | chlorophyll                  |                              | L       |
| 7.4            | 445                          | 15-Z-cryptoxanthin           | S       |
| 8.4            | 426sh, 450, 475              | $\beta$ -cryptoxanthin       | S       |
| 8.5            | 444, 478                     | unidentified                 | L       |
| 8.8            | 406 sh 428, 454 and phytoene | unidentified                 | S       |
| 9.1            | 420sh, 446, 472              | unidentified                 | L, S    |
| 9.5            | 428, 452                     | unidentified                 | L       |
| 9.8            | chlorophyll                  |                              | L       |
| 10.3           | 444, 468                     | $\alpha$ -carotene           | L, S    |
| 10.5           | (338), 442, 466              | cis-13- $\beta$ -carotene    | L, S    |
| 10.9           | 451, 477                     | all-trans- $\beta$ -carotene | L, S, R |
| 11.2           | (342), 446, 472              | cis-9- $\beta$ -carotene     | L, S, R |
| 11.6           | 428, 454, 488                | $\delta$ -carotene           | S       |
| 12.6           | 440, 464, 492                | $\gamma$ -carotene           | S       |
| 13.2           | (369), 440, 466, 496         | Cis-9-lycopene               | S       |
| 13.9           | 472, 502                     | all-trans-lycopene           | S       |
| 14.1           | (363), 446, 472, 503         | cis-lycopene                 | S       |

S= stigma; L= leaf, R= Root
